# Supplementary material for: Decreased cytotoxic T cells and TCR clonality in organ transplant recipients with squamous cell carcinoma
Source: NPJ Precis Oncol. 2020 Jun 3;4:13. doi: 10.1038/s41698-020-0119-9 (PMC7270180; doi:10.1038/s41698-020-0119-9)
Supplement: Supplementary file 1 — Supplementary Figures and Tables [file 41698_2020_119_MOESM1_ESM.pdf]

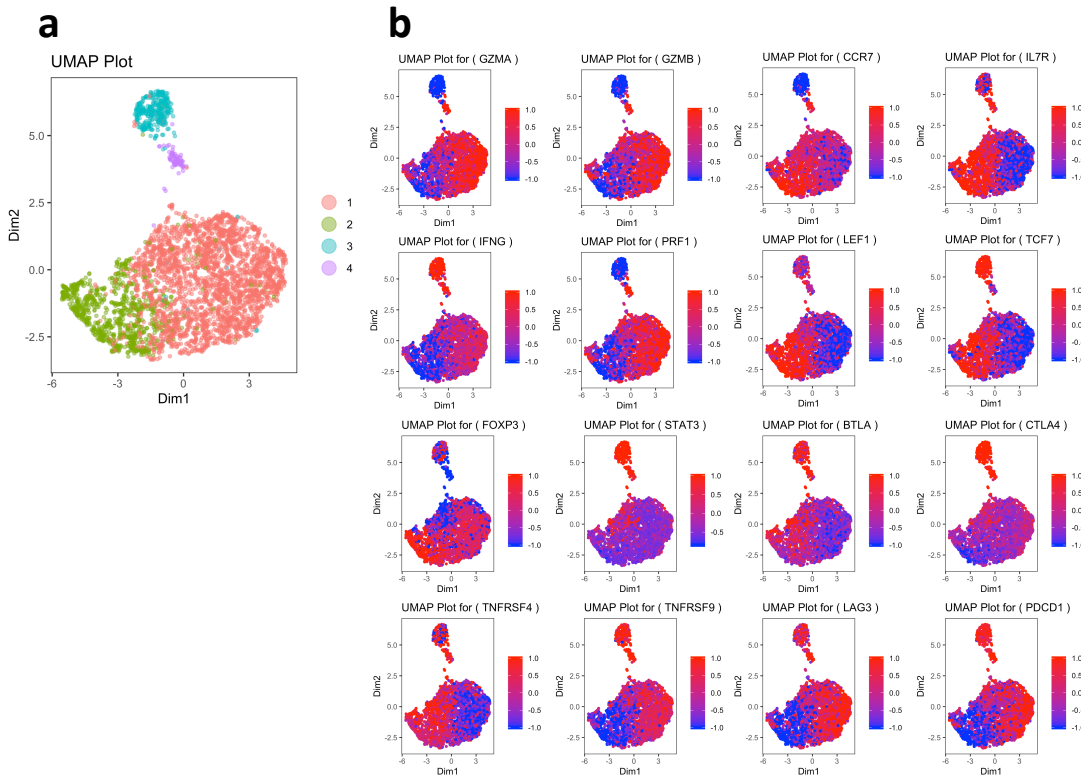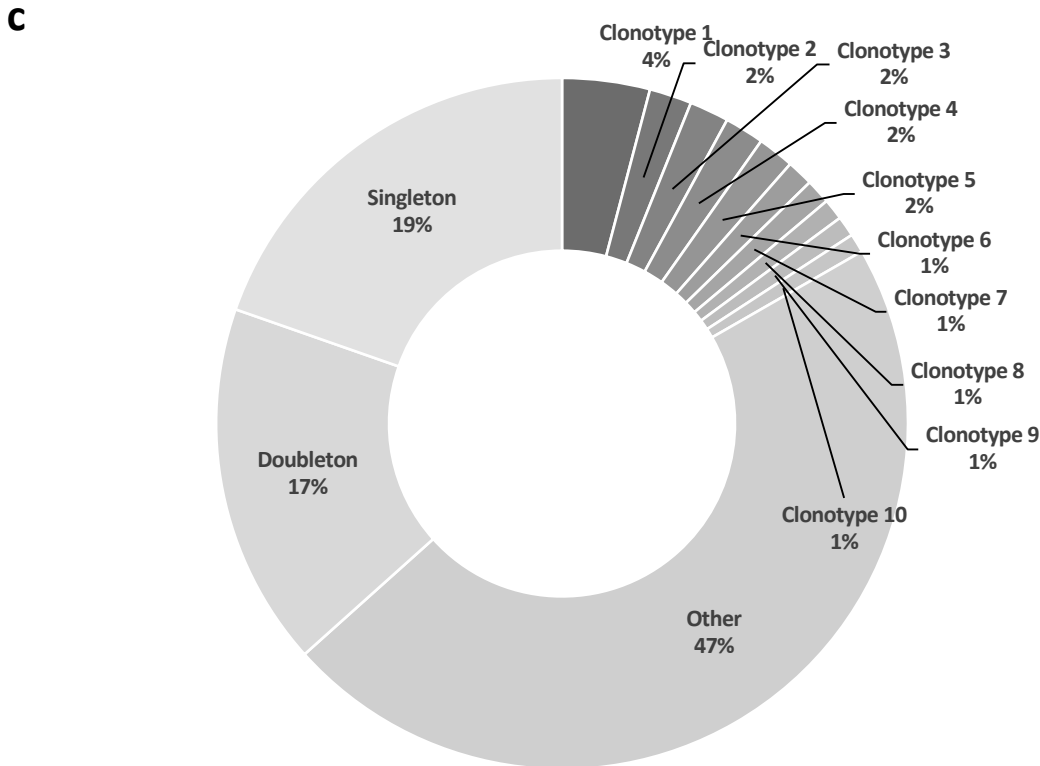

| Number of Unique TCR Clonotypes Per Quintile of Total scVDJ Reads |                   |
|-------------------------------------------------------------------|-------------------|
| 16                                                                | Upper Quintile    |
| 50                                                                | Uppermid Quintile |
| 153                                                               | Middle Quintile   |
| 321                                                               | Lowermid Quintile |
| 756                                                               | Lower Quintile    |

**Supplementary Figure 1.** UMAPs and gene expression heat maps for CD8+ T lymphocytes from human SCC1. CD8+ tumor infiltrating lymphocytes obtained from fresh SCC tumor specimens from 5 immunocompetent patients were subject to single-cell RNA profiling linked with T-cell receptor (TCR) sequencing. Data were analyzed using iCellR, a custom R package we developed for single cell sequencing analysis. (a) T cells were clustered according to their top 500 gene expression levels by RNAseq. (b) Expression of characteristic T lymphocyte genes are shown (clockwise from top left) for cytotoxic, naïve, exhausted and regulatory markers. Red indicates increased expression, whereas blue indicates reduced expression. (c) Percent of total scVDJ sequencing reads represented by unique clonotypes. Clonotypes 1-10 are the most frequently appearing clonotypes in SCC1. Doubletons are all clonotypes appearing twice and singletons are all clonotypes appearing once in SCC1. Other is all tripletons or higher, excluding the top ten most frequent clonotypes.

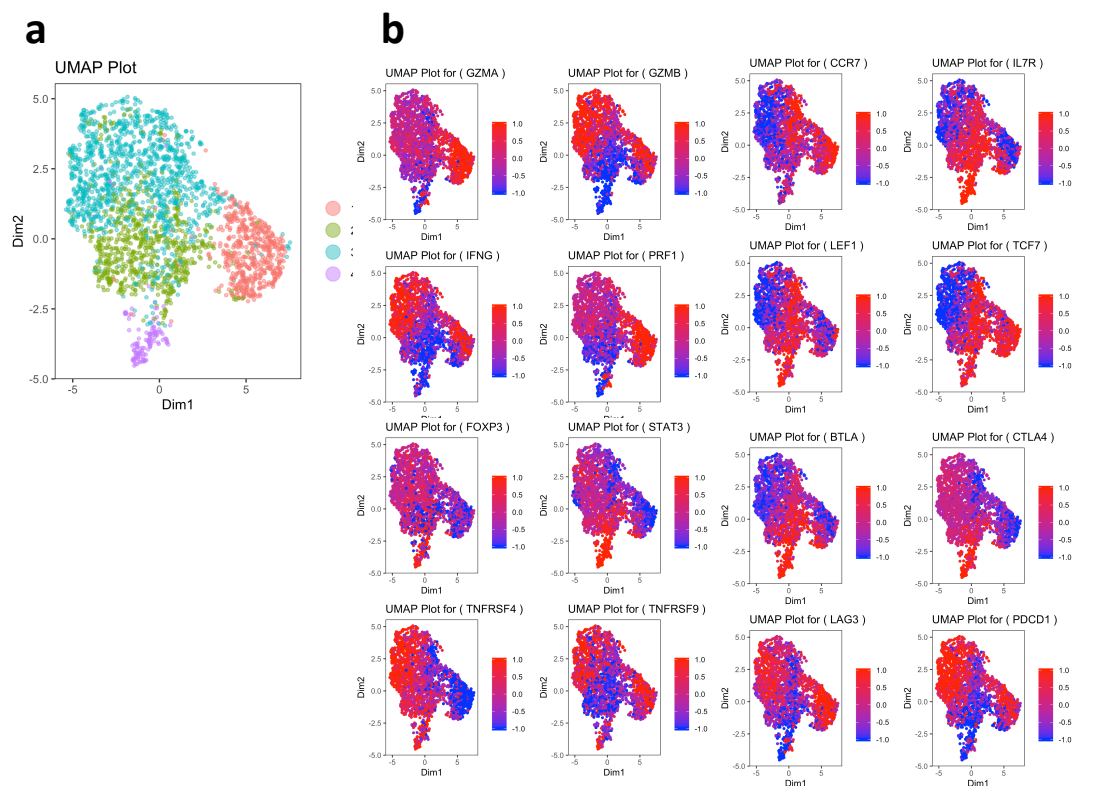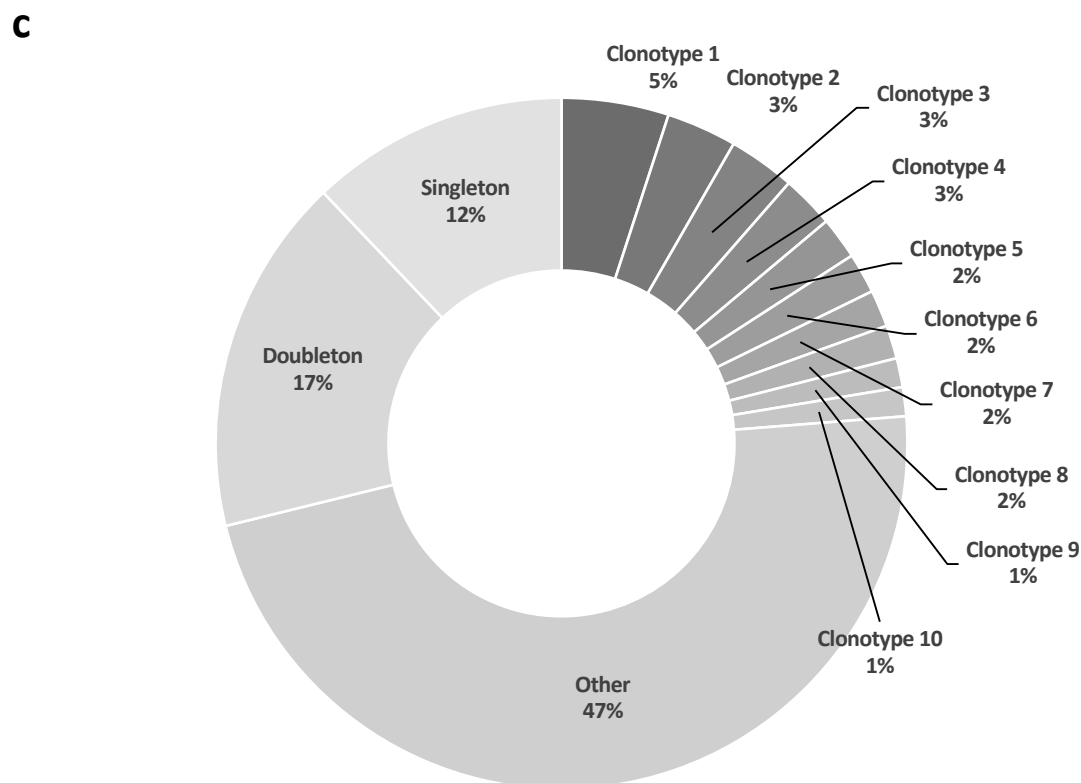

| Number of Unique TCR Clonotypes Per Quintile of Total scVDJ Reads |                   |
|-------------------------------------------------------------------|-------------------|
| 8                                                                 | Upper Quintile    |
| 25                                                                | Uppermid Quintile |
| 69                                                                | Middle Quintile   |
| 195                                                               | Lowermid Quintile |
| 515                                                               | Lower Quintile    |

**Supplementary Figure 2.** UMAPs and gene expression heat maps for CD8<sup>+</sup> T lymphocytes from human SCC2. CD8<sup>+</sup> tumor infiltrating lymphocytes obtained from fresh SCC tumor specimens from 5 immunocompetent patients were subject to single-cell RNA profiling linked with T-cell receptor (TCR) sequencing. Data were analyzed using iCellR, a custom R package we developed for single cell sequencing analysis. (a) T cells were clustered according to their top 500 gene expression levels by RNAseq. (b) Expression of characteristic T lymphocyte genes are shown (clockwise from top left) for cytotoxic, naïve, exhausted and regulatory markers. Red indicates increased expression, whereas blue indicates reduced expression. (c) Percent of total scVDJ sequencing reads represented by unique clonotypes. Clonotypes 1-10 are the most frequently appearing clonotypes in SCC2. Doubletons are all clonotypes appearing twice and singletons are all clonotypes appearing once in SCC2. Other is all tripletons or higher, excluding the top ten most frequent clonotypes.

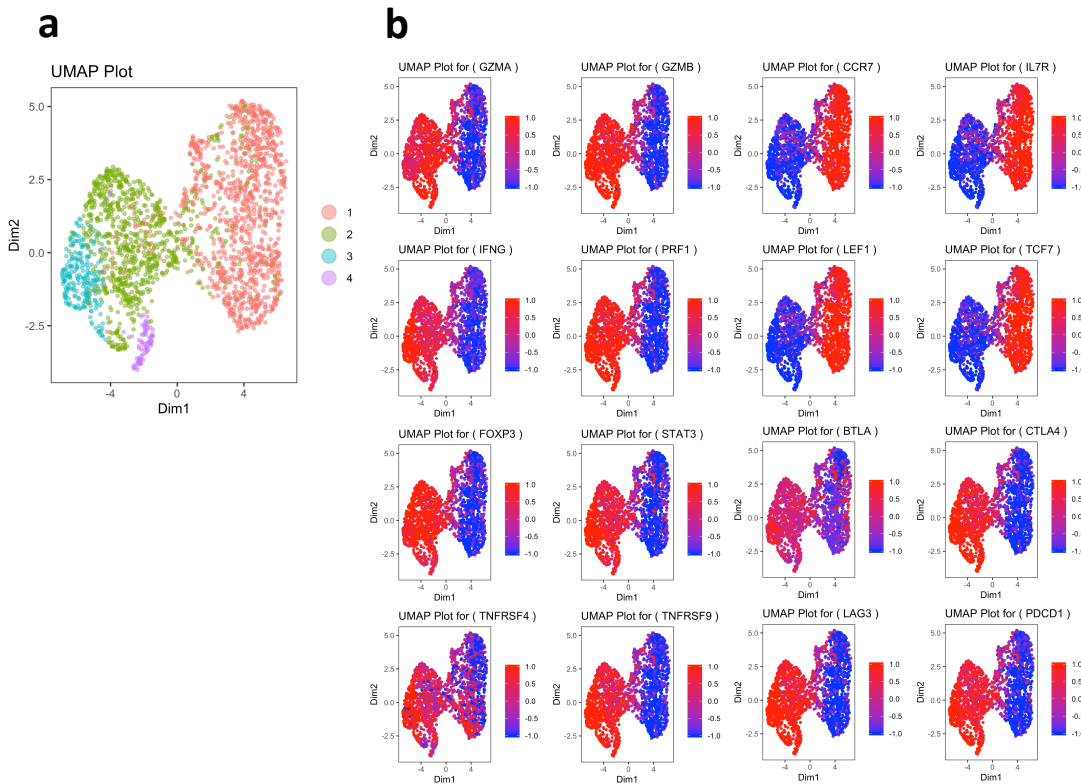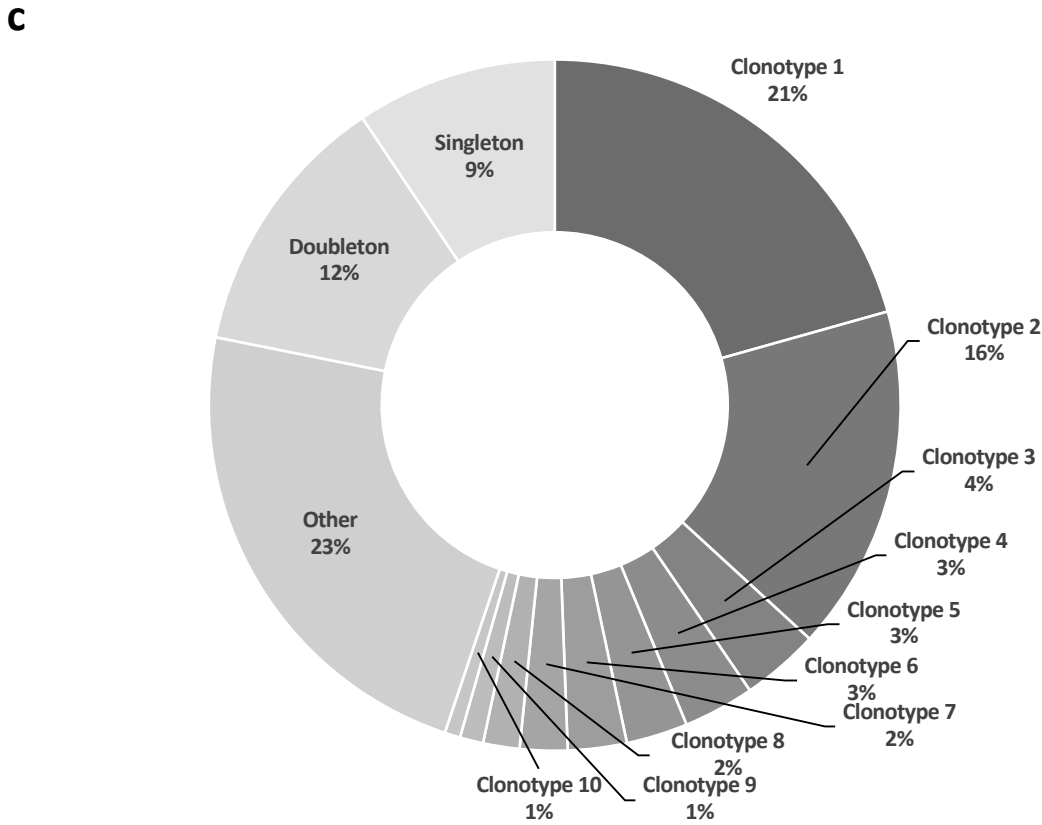

| Number of Unique TCR Clonotypes Per Quintile of Total scVDJ Reads |                   |
|-------------------------------------------------------------------|-------------------|
| 1                                                                 | Upper Quintile    |
| 2                                                                 | Uppermid Quintile |
| 16                                                                | Middle Quintile   |
| 107                                                               | Lowermid Quintile |
| 409                                                               | Lower Quintile    |

**Supplementary Figure 3.** UMAPs and gene expression heat maps for CD8+ T lymphocytes from human SCC4. CD8+ tumor infiltrating lymphocytes obtained from fresh SCC tumor specimens from 5 immunocompetent patients were subject to single-cell RNA profiling linked with T-cell receptor (TCR) sequencing. Data were analyzed using iCellR, a custom R package we developed for single cell sequencing analysis. (a) T cells were clustered according to their top 500 gene expression levels by RNAseq. (b) Expression of characteristic T lymphocyte genes are shown (clockwise from top left) for cytotoxic, naïve, exhausted and regulatory markers. Red indicates increased expression, whereas blue indicates reduced expression. (c) Percent of total scVDJ sequencing reads represented by unique clonotypes. Clonotypes 1-10 are the most frequently appearing clonotypes in SCC4. Doubletons are all clonotypes appearing twice and singletons are all clonotypes appearing once in SCC4. Other is all tripletons or higher, excluding the top ten most frequent clonotypes.

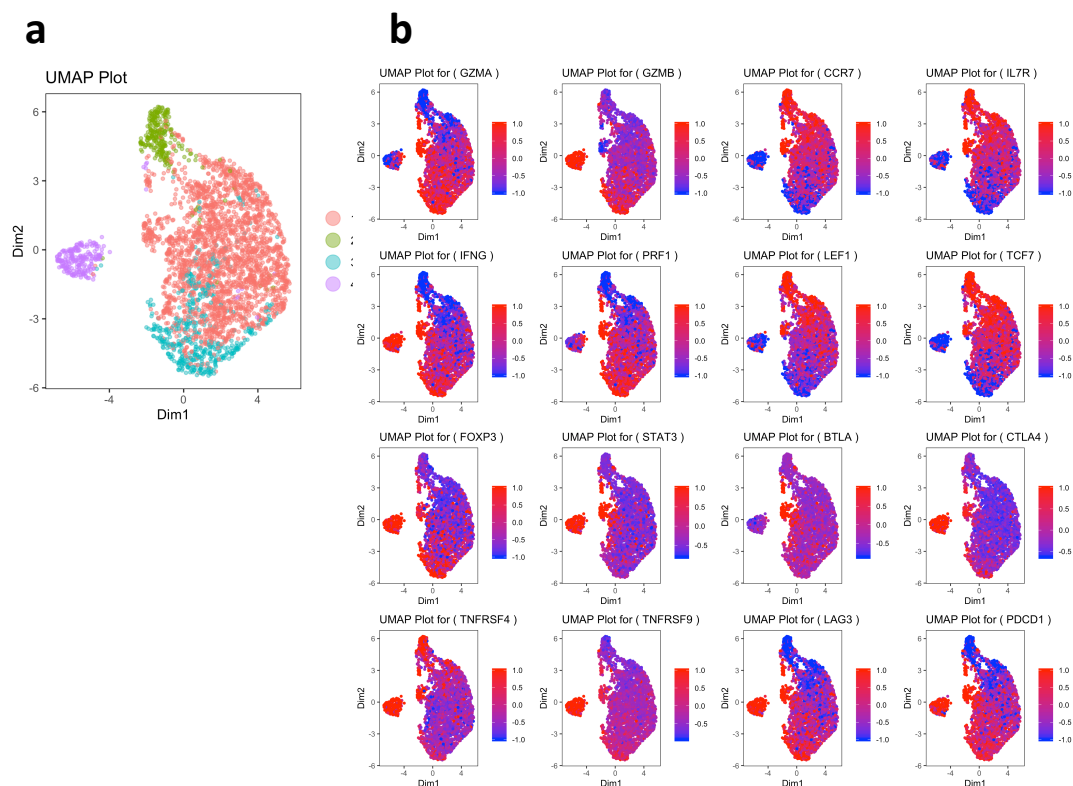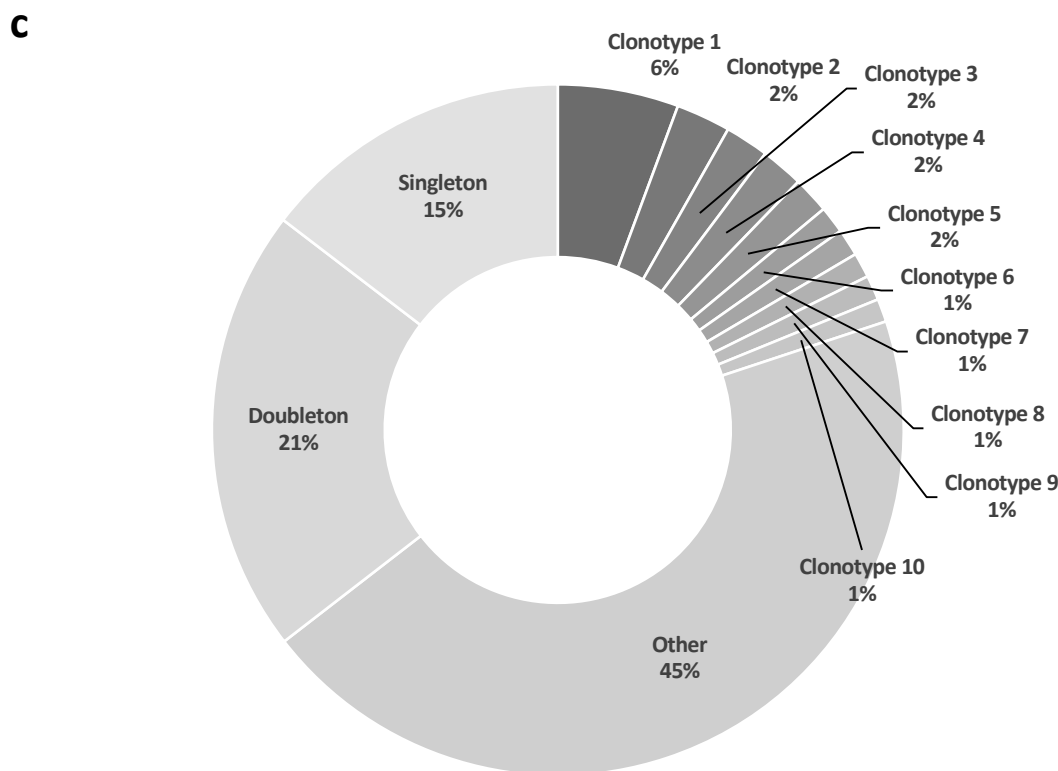

| Number of Unique TCR Clonotypes Per Quintile of Total scVDJ Reads |                   |
|-------------------------------------------------------------------|-------------------|
| 11                                                                | Upper Quintile    |
| 43                                                                | Uppermid Quintile |
| 123                                                               | Middle Quintile   |
| 332                                                               | Lowermid Quintile |
| 789                                                               | Lower Quintile    |

**Supplementary Figure 4.** UMAPs and gene expression heat maps for CD8<sup>+</sup> T lymphocytes from human SCC5. CD8<sup>+</sup> tumor infiltrating lymphocytes obtained from fresh SCC tumor specimens from 5 immunocompetent patients were subject to single-cell RNA profiling linked with T-cell receptor (TCR) sequencing. Data were analyzed using iCellR, a custom R package we developed for single cell sequencing analysis. (a) T cells were clustered according to their top 500 gene expression levels by RNAseq. (b) Expression of characteristic T lymphocyte genes are shown (clockwise from top left) for cytotoxic, naïve, exhausted and regulatory markers. Red indicates increased expression, whereas blue indicates reduced expression. (c) Percent of total scVDJ sequencing reads represented by unique clonotypes. Clonotypes 1-10 are the most frequently appearing clonotypes in SCC5. Doubletons are all clonotypes appearing twice and singletons are all clonotypes appearing once in SCC5. Other is all tripletons or higher, excluding the top ten most frequent clonotypes.

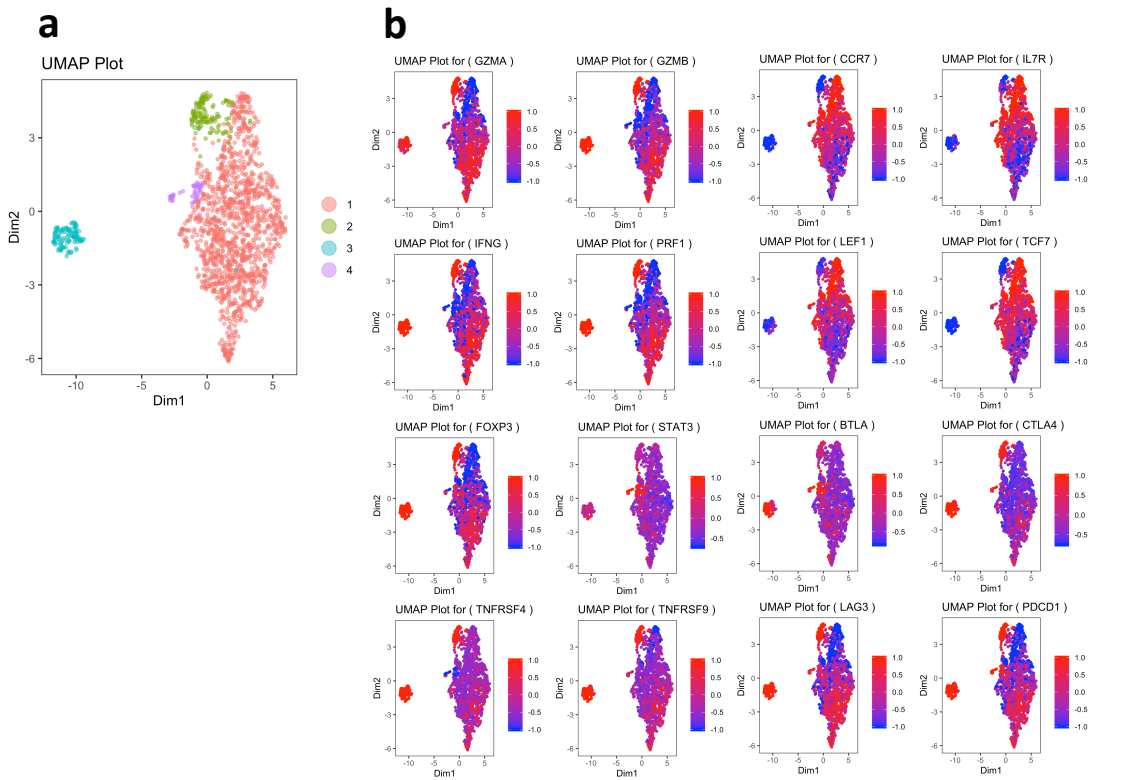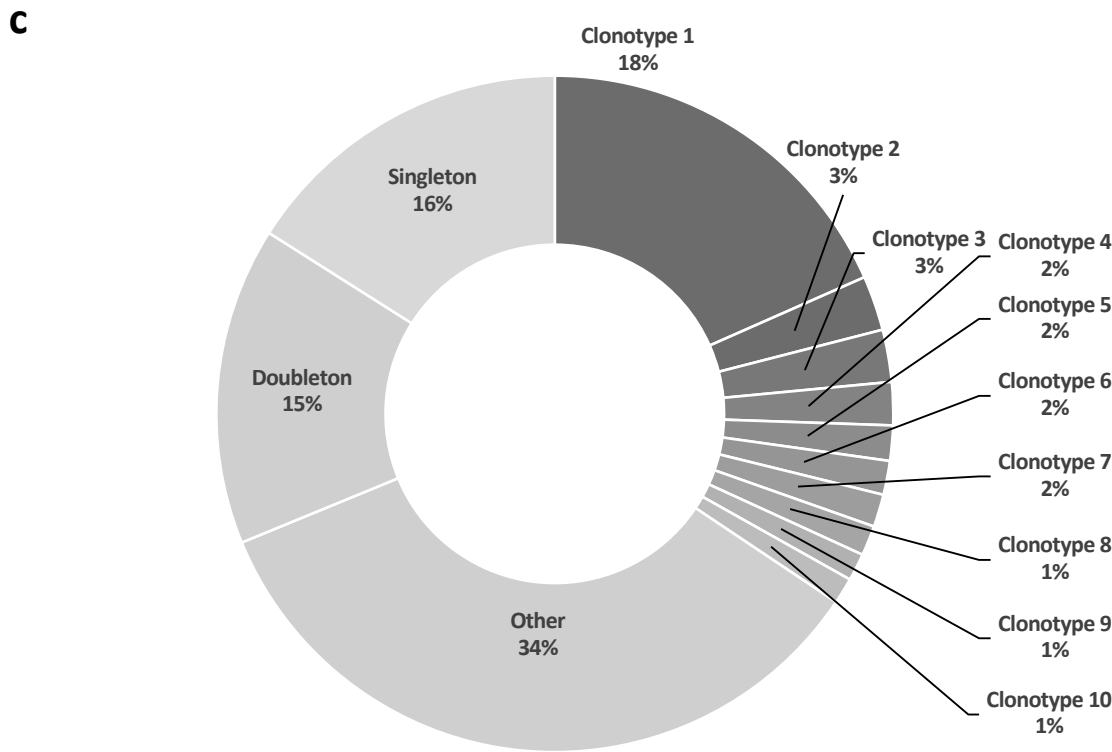

| Number of Unique TCR Clonotypes Per Quintile of Total scVDJ Reads |                   |
|-------------------------------------------------------------------|-------------------|
| 2                                                                 | Upper Quintile    |
| 14                                                                | Uppermid Quintile |
| 46                                                                | Middle Quintile   |
| 136                                                               | Lowermid Quintile |
| 354                                                               | Lower Quintile    |

**Supplementary Figure 5.** UMAPs and gene expression heat maps for CD8<sup>+</sup> T lymphocytes from human TSCC1. CD8<sup>+</sup> tumor infiltrating lymphocytes obtained from fresh TSCC tumor specimens from 5 immune suppressed transplant patients with 6 TSCCs were subject to single-cell RNA profiling linked with T-cell receptor (TCR) sequencing. Data were analyzed using iCellR, a custom R package we developed for single cell sequencing analysis. (a) T cells were clustered according to their top 500 gene expression levels by RNAseq. (b) Expression of characteristic T lymphocyte genes are shown (clockwise from top left) for cytotoxic, naïve, exhausted and regulatory markers. Red indicates increased expression, whereas blue indicates reduced expression. (c) Percent of total scVDJ sequencing reads represented by unique clonotypes. Clonotypes 1-10 are the most frequently appearing clonotypes in TSCC1. Doubletons are all clonotypes appearing twice and singletons are all clonotypes appearing once in TSCC1. Other is all tripletons or higher, excluding the top ten most frequent clonotypes.

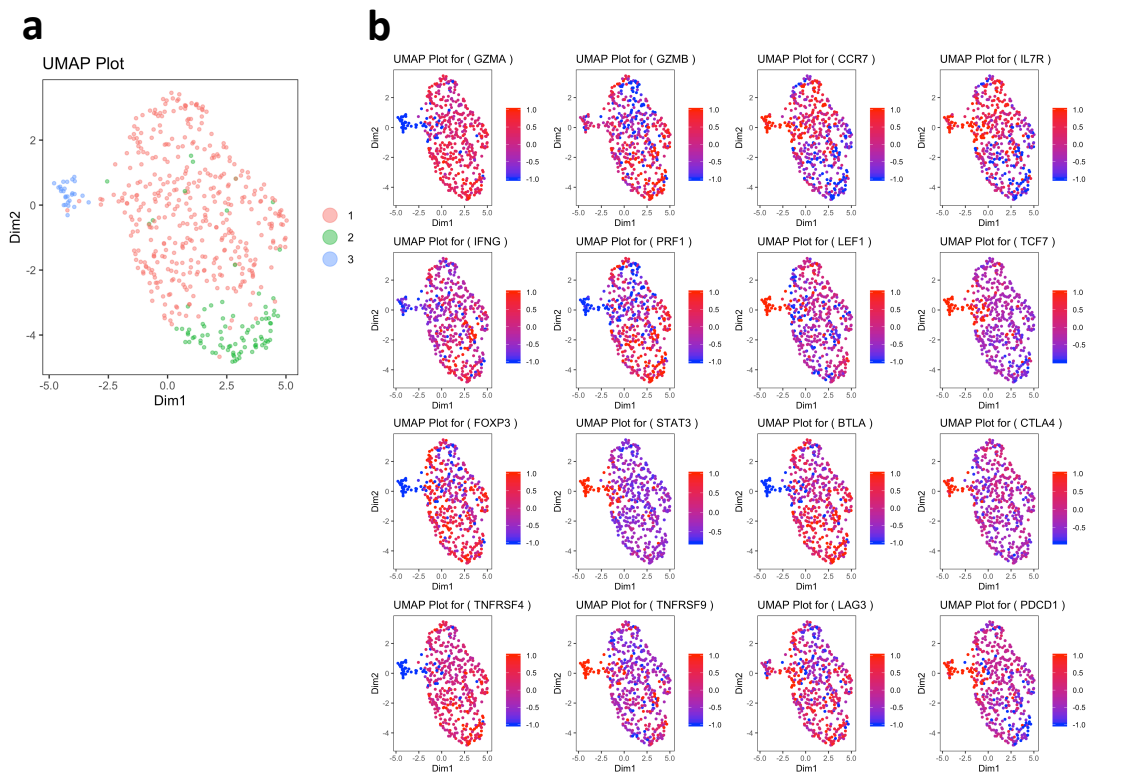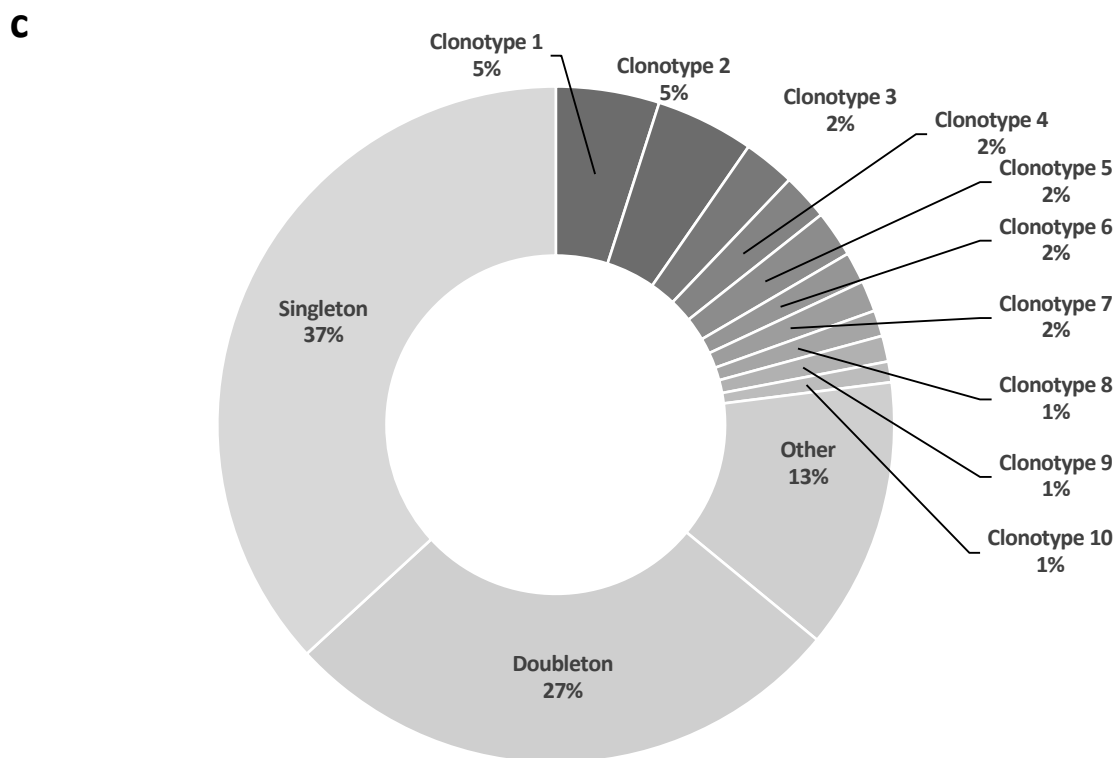

| Number of Unique TCR Clonotypes Per Quintile of Total scVDJ Reads |                   |
|-------------------------------------------------------------------|-------------------|
| 8                                                                 | Upper Quintile    |
| 29                                                                | Uppermid Quintile |
| 42                                                                | Middle Quintile   |
| 80                                                                | Lowermid Quintile |
| 120                                                               | Lower Quintile    |

**Supplementary Figure 6.** UMAPs and gene expression heat maps for CD8+ T lymphocytes from human TSCC2. CD8+ tumor infiltrating lymphocytes obtained from fresh TSCC tumor specimens from 5 immune suppressed transplant patients with 6 TSCCs were subject to single-cell RNA profiling linked with T-cell receptor (TCR) sequencing. Data were analyzed using iCellR, a custom R package we developed for single cell sequencing analysis. (a) T cells were clustered according to their top 500 gene expression levels by RNAseq. (b) Expression of characteristic T lymphocyte genes are shown (clockwise from top left) for cytotoxic, naïve, exhausted and regulatory markers. Red indicates increased expression, whereas blue indicates reduced expression. (c) Percent of total scVDJ sequencing reads represented by unique clonotypes. Clonotypes 1-10 are the most frequently appearing clonotypes in TSCC2. Doubletons are all clonotypes appearing twice and singletons are all clonotypes appearing once in TSCC2. Other is all tripletons or higher, excluding the top ten most frequent clonotypes.

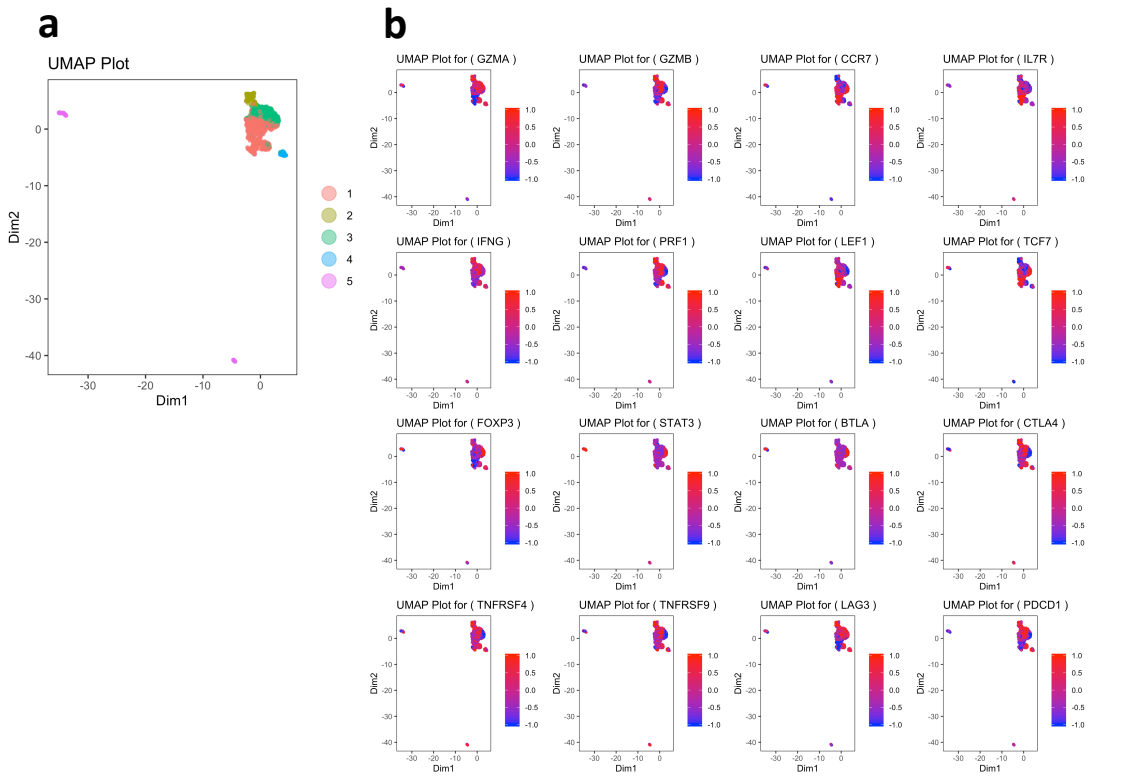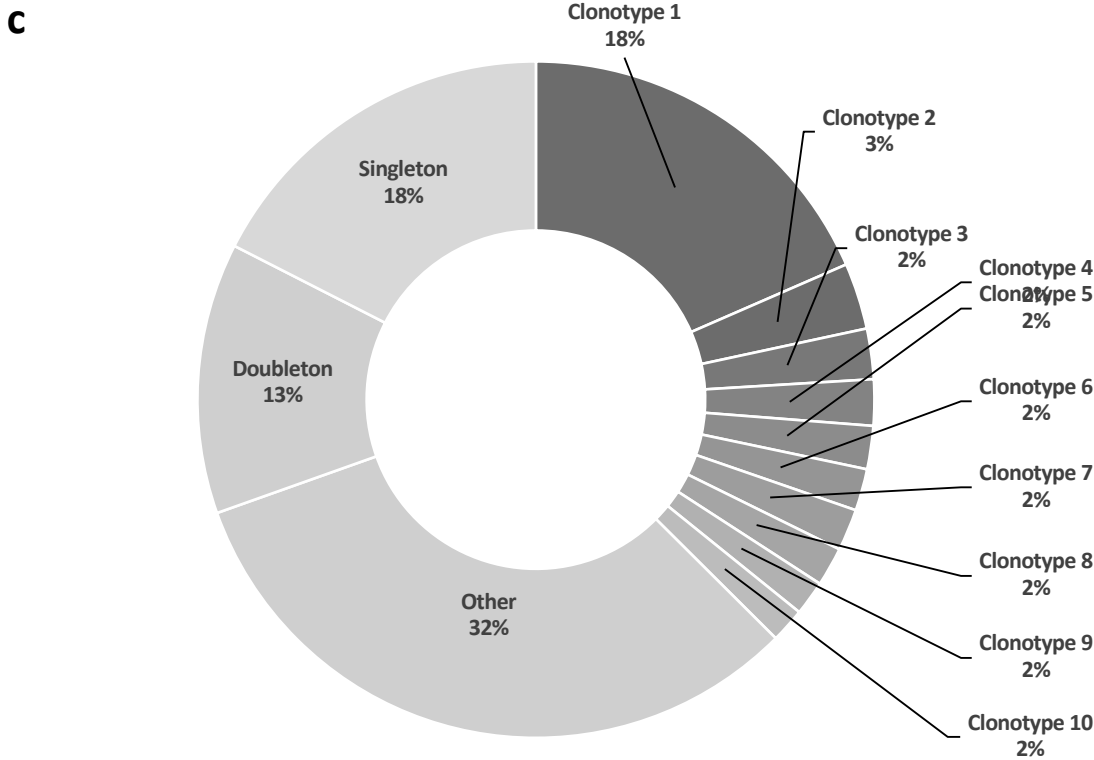

| Number of Unique TCR Clonotypes Per Quintile of Total scVDJ Reads |                   |
|-------------------------------------------------------------------|-------------------|
| 2                                                                 | Upper Quintile    |
| 11                                                                | Uppermid Quintile |
| 33                                                                | Middle Quintile   |
| 199                                                               | Lowermid Quintile |
| 326                                                               | Lower Quintile    |

**Supplementary Figure 7.** UMAPs and gene expression heat maps for CD8+ T lymphocytes from human TSCC3. CD8+ tumor infiltrating lymphocytes obtained from fresh TSCC tumor specimens from 5 immune suppressed transplant patients with 6 TSCCs were subject to single-cell RNA profiling linked with T-cell receptor (TCR) sequencing. Data were analyzed using iCellR, a custom R package we developed for single cell sequencing analysis. (a) T cells were clustered according to their top 500 gene expression levels by RNAseq. (b) Expression of characteristic T lymphocyte genes are shown (clockwise from top left) for cytotoxic, naïve, exhausted and regulatory markers. Red indicates increased expression, whereas blue indicates reduced expression. (c) Percent of total scVDJ sequencing reads represented by unique clonotypes. Clonotypes 1-10 are the most frequently appearing clonotypes in TSCC3. Doubletons are all clonotypes appearing twice and singletons are all clonotypes appearing once in TSCC3. Other is all tripletons or higher, excluding the top ten most frequent clonotypes.

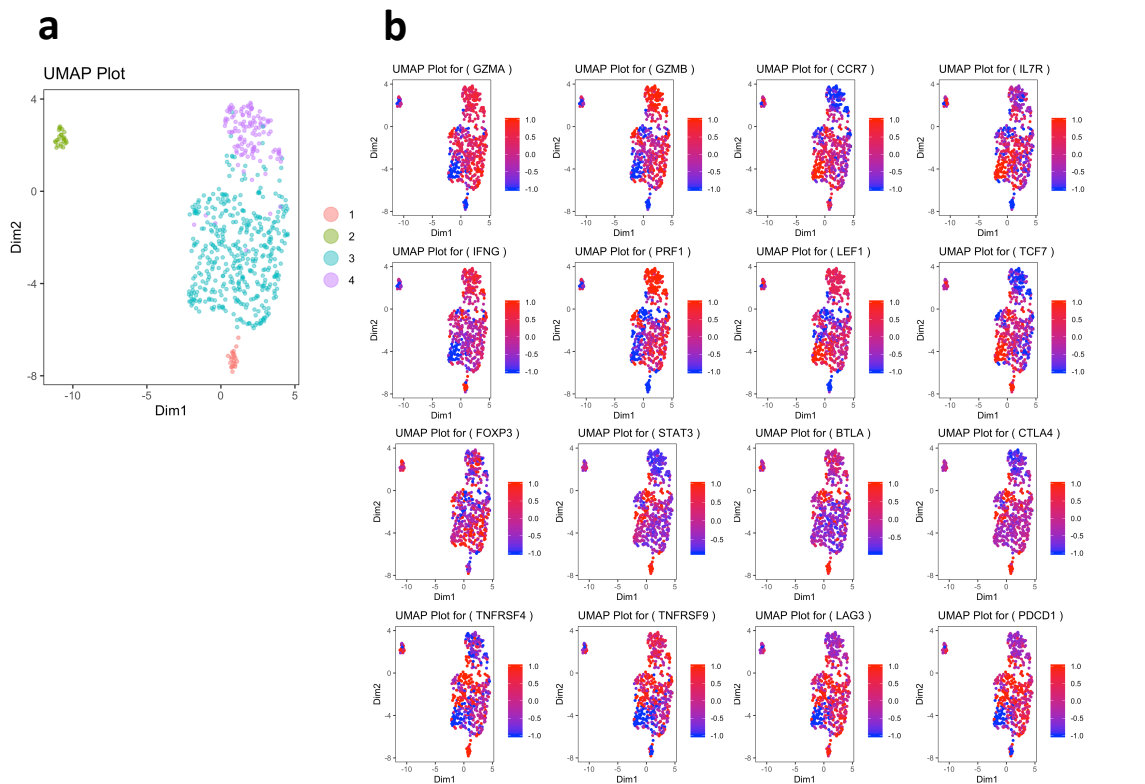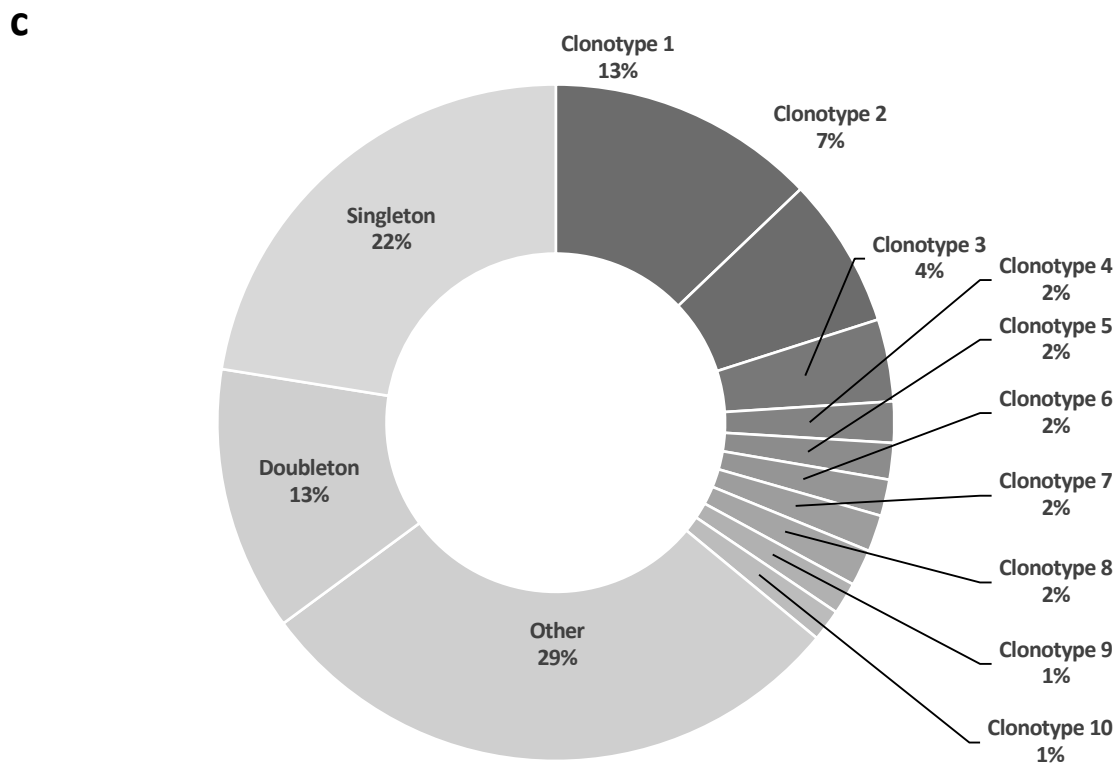

| Number of Unique TCR Clonotypes Per Quintile of Total scVDJ Reads |                   |
|-------------------------------------------------------------------|-------------------|
| 2                                                                 | Upper Quintile    |
| 13                                                                | Uppermid Quintile |
| 25                                                                | Middle Quintile   |
| 64                                                                | Lowermid Quintile |
| 124                                                               | Lower Quintile    |

**Supplementary Figure 8.** UMAPs and gene expression heat maps for CD8+ T lymphocytes from human TSCC4. CD8+ tumor infiltrating lymphocytes obtained from fresh TSCC tumor specimens from 5 immune suppressed transplant patients with 6 TSCCs were subject to single-cell RNA profiling linked with T-cell receptor (TCR) sequencing. Data were analyzed using iCellR, a custom R package we developed for single cell sequencing analysis. (a) T cells were clustered according to their top 500 gene expression levels by RNAseq. (b) Expression of characteristic T lymphocyte genes are shown (clockwise from top left) for cytotoxic, naïve, exhausted and regulatory markers. Red indicates increased expression, whereas blue indicates reduced expression. (c) Percent of total scVDJ sequencing reads represented by unique clonotypes. Clonotypes 1-10 are the most frequently appearing clonotypes in TSCC4. Doubletons are all clonotypes appearing twice and singletons are all clonotypes appearing once in TSCC4. Other is all tripletons or higher, excluding the top ten most frequent clonotypes.

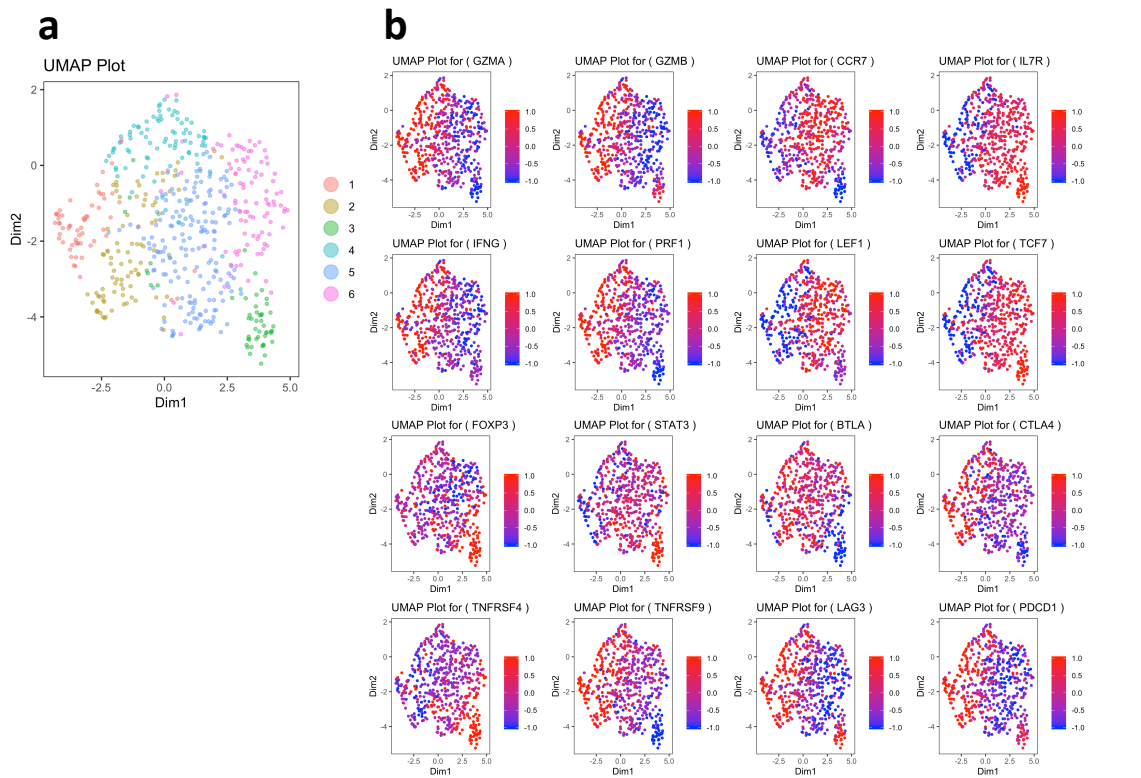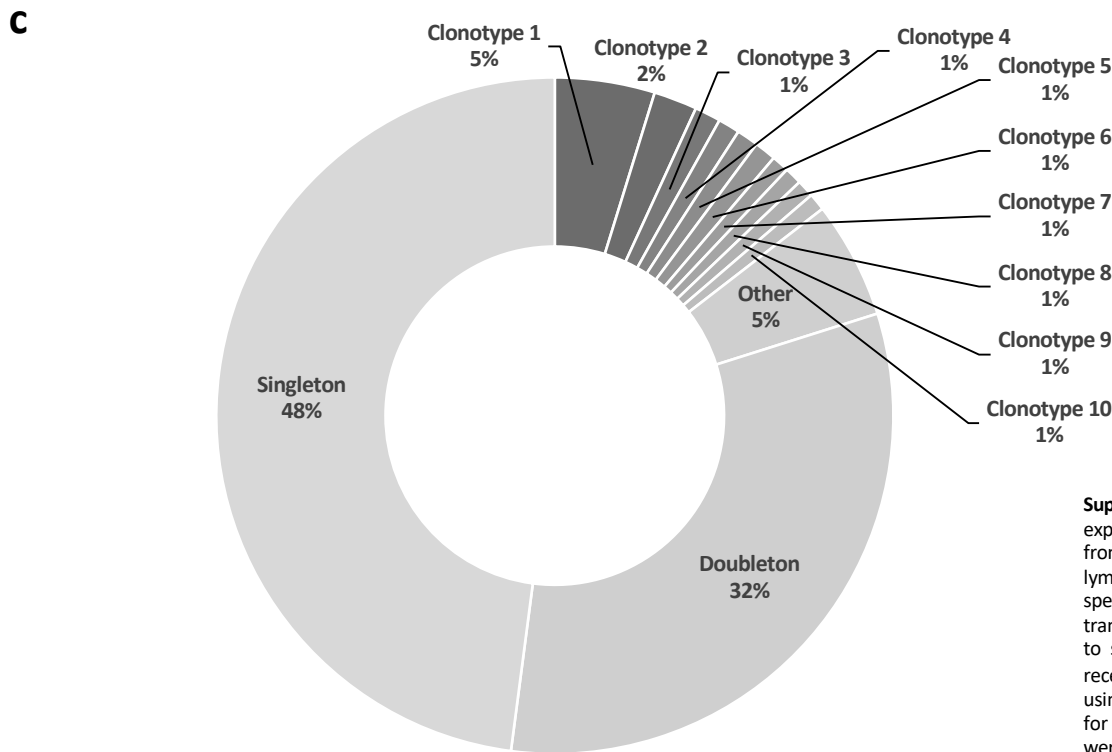

| Number of Unique TCR Clonotypes Per Quintile of Total scVDJ Reads |                   |
|-------------------------------------------------------------------|-------------------|
| 19                                                                | Upper Quintile    |
| 48                                                                | Uppermid Quintile |
| 67                                                                | Middle Quintile   |
| 97                                                                | Lowermid Quintile |
| 375                                                               | Lower Quintile    |

**Supplementary Figure 9.** UMAPs and gene expression heat maps for CD8+ T lymphocytes from human TSCC6. CD8+ tumor infiltrating lymphocytes obtained from fresh TSCC tumor specimens from 5 immune suppressed transplant patients with 6 TSCCs were subject to single-cell RNA profiling linked with T-cell receptor (TCR) sequencing. Data were analyzed using iCellR, a custom R package we developed for single cell sequencing analysis. (a) T cells were clustered according to their top 500 gene expression levels by RNAseq. (b) Expression of characteristic T lymphocyte genes are shown (clockwise from top left) for cytotoxic, naïve, exhausted and regulatory markers. Red indicates increased expression, whereas blue indicates reduced expression. (c) Percent of total scVDJ sequencing reads represented by unique clonotypes. Clonotypes 1-10 are the most frequently appearing clonotypes in TSCC6. Doubletons are all clonotypes appearing twice and singletons are all clonotypes appearing once in TSCC6. Other is all tripletons or higher, excluding the top ten most frequent clonotypes.

Supplementary Table 1. Patient and tumor characteristics.

| Tumor | Sex | Age | Site     | AJCC<br>Stage | BWH<br>Stage | Number<br>of<br>Tumors/<br>12 mo | Immunosuppression Regimen               | Organ Transplant                        |
|-------|-----|-----|----------|---------------|--------------|----------------------------------|-----------------------------------------|-----------------------------------------|
| SCC1  | F   | 83  | Leg      | 2             | 2A           | 1                                |                                         |                                         |
| SCC2  | F   | 84  | Ear      | 1             | 1            | 1                                |                                         |                                         |
| SCC3  | M   | 86  | Leg      | 2             | 2A           | 1                                |                                         |                                         |
| SCC4  | M   | 94  | Forehead | 2             | 2A           | 1                                |                                         |                                         |
| SCC5  | M   | 58  | Forehead | 2             | 2A           | 2                                |                                         |                                         |
| TSCC1 | F   | 71  | Leg      | 2             | 2A           | 6                                | Tacrolimus, mycophenolate               | Liver (2009)                            |
| TSCC2 | F   | 56  | Forehead | 2             | 2A           | 10                               | Azathioprine, prednisone                | Kidney (1985)                           |
| TSCC3 | F   | 56  | Neck     | 2             | 2A           | 10                               | Azathioprine, prednisone                | Kidney (1985)                           |
| TSCC4 | F   | 80  | Foot     | 2             | 2A           | 9                                | Sirolimus, prednisone, tacrolimus       | Kidney (1986), Liver/Dual Kidney (2004) |
| TSCC5 | M   | 66  | Temple   | 2             | 2A           | 3                                | Mycophenolate, tacrolimus               | Liver (2011)                            |
| TSCC6 | F   | 61  | Scalp    | 2             | 2A           | 4                                | Prednisone, mycophenolate, cyclosporine | Liver/Dual Kidney (2011)                |

Supplementary Table 2. Total clonotypes and total VDJ sequencing reads in cSCC tumors from immunocompetent (SCC1-5) and immunocompromised (TSCC1-6) patients.

| Tumor | Total<br>Clonotypes | Total<br>Reads |
|-------|---------------------|----------------|
| SCC1  | 1292                | 5856           |
| SCC2  | 1222                | 4869           |
| SCC3  | 1765                | 11508          |
| SCC4  | 531                 | 4944           |
| SCC5  | 1295                | 7222           |
| TSCC1 | 549                 | 3210           |
| TSCC2 | 275                 | 809            |
| TSCC3 | 488                 | 2904           |
| TSCC4 | 225                 | 917            |
| TSCC5 | 1462                | 6098           |
| TSCC6 | 375                 | 964            |

Supplementary Table 3. Percentage of known antigen versus neoantigen among the top 10 clonotypes in cSCC tumors from immunocompetent (SCC1-5) and immunocompromised (TSCC1-6) patients.

| Tumor   | TCR-alpha<br>Known Antigen | TCR-alpha<br>Neoantigen | TCR-beta<br>Known Antigen | TCR-beta<br>Neoantigen |
|---------|----------------------------|-------------------------|---------------------------|------------------------|
| SCC1    | 100%                       | 0%                      | 90%                       | 10%                    |
| SCC2    | 68%                        | 32%                     | 90%                       | 10%                    |
| SCC3    | 60%                        | 40%                     | 87%                       | 13%                    |
| SCC4    | 79%                        | 21%                     | 93%                       | 7%                     |
| SCC5    | 74%                        | 26%                     | 96%                       | 4%                     |
| Average | 76%                        | 24%                     | 91%                       | 9%                     |
| TSCC1   | 68%                        | 32%                     | 88%                       | 13%                    |
| TSCC2   | 96%                        | 4%                      | 91%                       | 9%                     |
| TSCC3   | 82%                        | 18%                     | 89%                       | 11%                    |
| TSCC4   | 80%                        | 20%                     | 92%                       | 8%                     |
| TSCC5   | 67%                        | 33%                     | 89%                       | 12%                    |
| TSCC6   | 75%                        | 25%                     | 91%                       | 9%                     |
| Average | 78%                        | 22%                     | 90%                       | 10%                    |

Supplementary Table 4. Putative antigens of the top 10 clonotypes in cSCC tumors from immunocompetent (SCC1-5) and immunocompromised (TSCC1-6) patients based on McPAS analysis (wobble &lt; 8).

| Sample | Clonotype | Alpha CDR3         | Putative Antigen Classification | Putative Antigens                        | Beta CDR3         | Putative Antigen Classification | Putative Antigens                                       |
|--------|-----------|--------------------|---------------------------------|------------------------------------------|-------------------|---------------------------------|---------------------------------------------------------|
| SCC1   | 1         | CAVKDFNKFYF        | Cancer                          | SEC24A-FLY                               | CASSLFSGTGTNEQFF  |                                 |                                                         |
|        | 2         | CILRGAGTSYGKLTf    |                                 |                                          | CASSLQGANYEQYF    | Melanoma, Cancer                | Mutated CDKNA2, ATP6AP-KLG_G3W, FNDC3B_L3M              |
|        | 3         | CAMKAGGTSYGKLTf    | Melanoma                        | MART-1                                   | CASSPSGRGHEQYF    |                                 |                                                         |
|        | 4         | CAMRDLYSGAGSYQLTF  | Cancer                          | NSDHL-A9V                                | CASSLDASGRGYEQYF  | Renal Clear Cell Carcinoma      |                                                         |
|        | 5         |                    |                                 |                                          | CASSQDGAGWADQPQHF |                                 |                                                         |
|        | 6         |                    |                                 |                                          | CASSLFSGTGTNEQFF  |                                 |                                                         |
|        | 7         | CAVRDMSSGNTGKLIF   |                                 |                                          | CASRFDWGRDTEAFF   |                                 |                                                         |
|        | 8         | CAVRGSGTYKYIF      | Cancer                          | SREBF1-YLQ_L6M                           | CASSLSKGDGYGYTF   | Melanoma                        | Mutated CDKNA2                                          |
|        | 9         | CASSPSLRTLADTQYF   |                                 |                                          | CASSYGHGETQYF     |                                 |                                                         |
|        | 10        | CLVGDIPTRRYNFNKFYF | Cancer                          | OR14C36-FML_V6L                          | CASSPTLTGDLTDQYF  |                                 |                                                         |
| SCC2   | 1         | CAVLPAYGGSQGNLIF   |                                 |                                          | CASSRGPNPRTAEFF   |                                 |                                                         |
|        | 2         | CAVSYNDMRF         | Neoantigen                      | LCP1-NLF                                 | CASSPLAGGNLETQYF  | Melanoma, Colorectal Cancer     | MART-1                                                  |
|        | 3         | CALTRNNARLMF       |                                 |                                          | CATAGVQETQYF      | Neoantigen                      | PIGN-FLT_P7H                                            |
|        | 4         | CATDAPDSNYQLIW     | Neoantigen                      | STOX1-RLM_M3I                            | CASSYKGNNSPLHF    | Neoantigen                      | FNDC3B                                                  |
|        | 5         | CALSDTETSGSRLTF    |                                 |                                          | CASSGTNQETQYF     | Melanoma, Neoantigen            | Mutated CDKNA2, GANAG-S5F                               |
|        | 6         | CAFIDSGAGSYQLTF    | Neoantigen                      | HOXC9-YMY, GNL3L_R4C                     | CRIPSSTDQYF       |                                 |                                                         |
|        | 7         | CAMSFQYNDMRF       |                                 |                                          | CASSLSGEVRNEQFF   |                                 |                                                         |
|        | 8         | CAAIPWGNAGKSTF     | Neoantigen                      | GNL3L_R4C                                | CASSIPVGLGYGYTF   | Neoantigen                      | CNKSRI-SLA_A9V, SEC24A-FLY                              |
|        | 9         |                    |                                 |                                          | CASSRGPNPRTAEFF   |                                 |                                                         |
|        | 10        | CAVRHISNQFYF       | Neoantigen                      | IPO9-FSS, MLL2-L8H                       | CASSDRGRSNEQFF    |                                 |                                                         |
| SCC3   | 1         | CAVNKNYDYKLSF      | Neoantigen                      | CNKSRI-SLA_A9V, DCHS1-TLF_I5M, PHKA2-LLS | CASSLEEGTTDTQYF   |                                 |                                                         |
|        | 2         | CAETITGGGNKLTf     |                                 |                                          | CASSSARDRGYEQYF   |                                 |                                                         |
|        | 3         | CAARFSNQFYF        | Neoantigen, Melanoma            | IPO9-FSS, MLL2-L8H, ZNT8_LLS, MART-1     | CASSSQGISYEQYF    | Neoantigen                      | OR14C36-FML_V6L, OR5M3-KMV, FNDC3B_L3M, GNL3L_R4C, MRM1 |
|        | 4         | CARTNSGNTPLVF      | Neoantigen                      | SEC24A-P5L                               | CASSSGHDGPTDTQYF  | Melanoma                        | MART-1                                                  |
|        | 5         | CAVTWGQAGTALIF     | Neoantigen                      | LCP1-NLF, FNDC3B-L3M                     | CASSSTSGYNEQFF    |                                 |                                                         |
|        | 6         | CVFAINFNKFYF       | Neoantigen                      | HTR1F-LVM_V2M                            | CASSLIGAGELFF     | Melanoma                        | IGRP_VLF                                                |
|        | 7         | CAVNAGWTGNQFYF     |                                 |                                          | CSARGGISGPLNEKLFF |                                 |                                                         |
|        | 8         | CAVTDDYKLSF        |                                 |                                          | CASRQETGVKNEQYF   |                                 |                                                         |
|        | 9         | CAVNKNYDYKLSF      | Neoantigen                      | CNKSRI-SLA_A9V, PHKA2-LLS, DCHS1-TLF_I5M |                   |                                 |                                                         |
|        | 10        | CVFAINFNKFYF       | Neoantigen                      | HTR1F-LVM_V2M                            | CASSLGNEQFF       |                                 |                                                         |
| SCC4   | 1         | CAGGRSSNTGKLIF     |                                 |                                          | CASRTGAGATEAFF    |                                 |                                                         |
|        | 2         | CATDGVEYGKLVF      | Neoantigen                      | SEC24A_P5L, SMARCD3                      | CASSLVSGGNEQYF    |                                 |                                                         |
|        | 3         | CVVSDRYNNARLMF     | DM1                             |                                          | CSAREGTGGLSYEQYF  |                                 |                                                         |
|        | 4         | CAPLGSGGYQKVTF     | Neoantigen                      | PIGN-FLT_P7H                             | CASSFQGGWNTEAFF   | Neoantigen                      | APBB2-VQY_L7F                                           |
|        | 5         | CAVVRTGTASKLTf     | Neoantigen                      | C1S-9_N1H, ST6GALNAC2-LLF_Y6H            | CASSPNYSNPQHF     | Neoantigen                      | GNL3L_R4C                                               |
|        | 6         | CAPLGSGGYQKVTF     | Neoantigen                      | PIGN-FLT_P7H                             | CASSFQGGWNTEAFF   | Neoantigen                      | APBB2-VQY_L7F                                           |
|        | 7         | CAVRVPPWDYKLSF     | Neoantigen                      | BAIAP3-ILN, NOS1-FID                     | CASSLRGVAKNIQYF   |                                 |                                                         |
|        | 8         | CAASTDYGQNFVF      |                                 |                                          | CASSLTGLTEAFF     |                                 |                                                         |
|        | 9         |                    |                                 |                                          | CASRTGAGATEAFF    |                                 |                                                         |

|       |    |                  |                         |                                                                              |                   |                                                               |                                          |
|-------|----|------------------|-------------------------|------------------------------------------------------------------------------|-------------------|---------------------------------------------------------------|------------------------------------------|
|       | 10 | CAVNSPPGNEKLTF   | Melanoma, Neoantigen    | MART-1, CCM2-YML_R6H, MLL2                                                   | CASSQSEGRSDTQYF   |                                                               |                                          |
| SCC5  | 1  | CAVKDSNYQLIW     | Neoantigen, Lymphoma    | OR14C36-FML_V6L, BCL9L-FVY, OR5M3-KMV, WDR46-T3I                             | CSGTTGGIAEAF      |                                                               |                                          |
|       | 2  | CAMTPSGGSYIPTF   | Neoantigen              | KCNB2-LLA_P6T, ZNF827-NLF                                                    | CASSPRDGNIEQYF    |                                                               |                                          |
|       | 3  | CAATNYGQNFVF     | Influenza, Melanoma     | Matrix protein (M1), MART-RYR3-VLN_E6K, VN1R5_MII_S7Y, SNX24_P6L, PABPC1-R5Q | CASSVNGGEHNEQFF   |                                                               |                                          |
|       | 4  | CASFRDRVANYGYTF  | Neoantigen              |                                                                              | CASSLGGGFYNEQFF   | Melanoma, Clear Cell Renal Carcinoma, Lung Cancer, Neoantigen | mutated CDKNA2, NY-ESO-1f, INTS1-VLL_L3F |
|       | 5  | CAVRGSYIPTF      | Neoantigen              | ZNT8-LLS                                                                     | CASGSDGNTDTQYF    | Neoantigen, Melanoma                                          | OR5M3-KMV, CD1_LLG, MART-1               |
|       | 6  | CAVSLYNFNKFYF    | Neoantigen              | CD47-GLT_V6F, MLL2-L8H                                                       | CASSDLTTNTGELFF   |                                                               |                                          |
|       | 7  | CALSEATDSDWGKFQF |                         |                                                                              | CASSRGLSYNEQFF    |                                                               |                                          |
|       | 8  | CAMTPDNYGQNFVF   | Neoantigen              | OR5M3-KMV, OR5M3-KMV_T8N, HAUS3-ILN_T7A                                      | CSARAMTEETGELFF   |                                                               |                                          |
|       | 9  | CVVNFGDSSYLIF    |                         |                                                                              | CASSFMGRRNSPLHF   |                                                               |                                          |
|       | 10 | CALAGGTSYGKLTf   | Neoantigen, Melanoma    | OR14C36-FML_V6L, PIGN-FLT_P7H, MART-1                                        | CSGTTGGIAEAF      |                                                               |                                          |
| TSCC1 | 1  | CAVNSNYQLIW      | Neoantigen              | PIGN-FLT_P7H                                                                 | CASRATLGSGTEQYF   | Clear Cell Renal Carcinoma, Neoantigen                        | FNDC3B                                   |
|       | 2  |                  |                         |                                                                              | CASRATLGSGTEQYF   | Clear Cell Renal Carcinoma, Neoantigen                        | FNDC3B                                   |
|       | 3  | CAMRELNRRDDKIIF  |                         |                                                                              | CASSFHDRADKELFF   |                                                               |                                          |
|       | 4  | CAMRGRSYNTDKLIF  | Neoantigen              | FNDC3B-VVL_L3M, ITIH6-RLG_G3V, GOLGA3-SLD_P4L, ITIH6-RLG                     | CASSPQGRVTEAF     |                                                               |                                          |
|       | 5  | CALSEADGANNLFF   | Neoantigen              | NSDHL_A9V                                                                    | CASSIPSRAGGDNEQFF |                                                               |                                          |
|       | 6  | CLVGPGPTYKYIF    | Neoantigen              | CHD8-KLN                                                                     | CATSGTSTLYNEQFF   |                                                               |                                          |
|       | 7  | CAVKRTGNQFYF     | Breast Cancer, Melanoma | GP100_IMD                                                                    | CASRPTPYEQYF      | Neoantigen                                                    | CHD8-KLN_P7A, MRM1, AGL_GLI              |
|       | 8  | CAASIGGTASKLTf   | Melanoma                | MART-1                                                                       | CASSFLGGRLSDTQYF  | Neoantigen                                                    | FNDC3B                                   |
|       | 9  | CAMLDTGNOFYF     | Melanoma, Neoantigen    | MART-1, PLXNB1-VLF, PTCHD4-HQL, ATP6AP1-KLG_G3W, NSDHL_A9V                   | CASSLDREDEKLFF    |                                                               |                                          |
|       | 10 | CAMRDYGQNFVF     | Melanoma                | OR5M3-KMV_T8N                                                                | CASSDPGGTGELFF    | CMV                                                           | OR5M3-KMV_T8N                            |
| TSCC2 | 1  | CAYKDRGSTLGRLYF  | Neoantigen, Melanoma    | TRPC1-MLL_Q5H, GP100-IMD                                                     | CSARDENRGWETQYF   |                                                               |                                          |
|       | 2  | CATEEDNRLAF      |                         |                                                                              | CSVDLAGGYEQYF     |                                                               |                                          |
|       | 3  | CASSLAAETSYEQYF  |                         |                                                                              | CAVNSRGSTLGRLYF   |                                                               |                                          |
|       | 4  | CAVRDMPPGGFKTIF  | Melanoma                | GP100_IMD                                                                    | CASSSGLAGIYEQYF   | Melanoma                                                      | MART-1                                   |
|       | 5  | CAMGNSGGSNYKLTF  |                         |                                                                              | CAISGGGAINKELFF   | Neoantigen                                                    | USP28-LII_C5F, GLRA1-LIF                 |
|       | 6  |                  |                         |                                                                              | CASSFTRLYNEQFF    | Neoantigen                                                    | TRIM16-RMA_R1T                           |
|       | 7  | CAMGNSGGSNYKLTF  |                         |                                                                              | CAIMPGLVGYEQYF    | Melanoma                                                      | MART-1                                   |

|       |    |                  |                                |                                                                                                                        |                  |                                                                                    |                                                                          |
|-------|----|------------------|--------------------------------|------------------------------------------------------------------------------------------------------------------------|------------------|------------------------------------------------------------------------------------|--------------------------------------------------------------------------|
|       | 8  | CAVSLEEKTSYDKVIF |                                |                                                                                                                        | CAIMPGFLVGAYEQYF | Melanoma                                                                           | MART-1                                                                   |
|       | 9  | CAVGARRGADGLTF   | Melanoma                       | MART-1                                                                                                                 | CASSPRDRAYEQYF   | Neoantigen                                                                         | TRIM58-YMV_V3F, ERBB2, IV-GIL                                            |
|       | 10 | CAVGAIDTNAGKSTF  |                                |                                                                                                                        | CASSTSGGFGDEQFF  |                                                                                    |                                                                          |
| TSCC3 | 1  | CAVNSNYQLIW      | Neoantigen                     | PIGN-FLT_P7H                                                                                                           | CASRATLGSGTEQYF  | CMV, RA, EBV, Influenza, Clear Cell Renal Carcinoma, Allergy, HIV, Neoantigen, HCV | pp65, BZLF-1, Matrix protein (M1), Gag polyprotein RQ13, FNDC3B, HCV-KLV |
|       | 2  | CAVKRTGNQFYF     | Breast Cancer, Melanoma        | GP100_IMD                                                                                                              | CASRPTPYEQYF     | Neoantigen                                                                         | CHD8-KLN_P7A, MRM1, AGL_GLI                                              |
|       | 3  |                  |                                |                                                                                                                        | CASRATLGSGTEQYF  | Clear Cell Renal Carcinoma, Neoantigen                                             | FNDC3B                                                                   |
|       | 4  | CAMRDYGQNFVF     | Neoantigen                     | OR5M3-KMV_T8N<br>FNDC3B-VVL_L3M, ITIH6-RLG_G3V, GOLGA3-SLD_P4L, ITIH6-RLG                                              | CASSDPGGTGELFF   | Neoantigen                                                                         | OR5M3-KMV_T8N                                                            |
|       | 5  | CAMRGRSYNTDKLIF  | Neoantigen                     |                                                                                                                        | CASSPQGRVTEAFF   |                                                                                    |                                                                          |
|       | 6  | CLVGPGTYKYIF     | Neoantigen                     | CHD8-KLN                                                                                                               | CATSGTSTLYNEQFF  |                                                                                    |                                                                          |
|       | 7  | CAVDDYKLSF       | Neoantigen                     | CD1-LLG                                                                                                                | CASRGDYQETQYF    |                                                                                    |                                                                          |
|       | 8  | CAVRDESSNTGKLIF  | Melanoma                       | GP100_IMD                                                                                                              | CASREQGGTEAFF    | Neoantigen                                                                         | VN1R5_MII_S7Y                                                            |
|       | 9  | CAMRELNRRDDKIIF  |                                |                                                                                                                        | CASSFHDRADEKLFF  |                                                                                    |                                                                          |
|       | 10 | CAVMDSGYSTLTF    | Neoantigen                     | FNDC3B-VVL_L3M, WDR46-FLT_T3I, ZNT8_VMI                                                                                | CASSTSGTNYEQYF   | Melanoma, Neoantigen                                                               | MART-1, ATP6AP1-KLG_G3W                                                  |
| TSCC4 | 1  | CAVKRTGNQFYF     | Breast Cancer, Melanoma        | GP100_IMD                                                                                                              | CASRPTPYEQYF     | Neoantigen                                                                         | CHD8-KLN_P7A, MRM1, AGL_Gli                                              |
|       | 2  | CAVNSNYQLIW      | Neoantigen                     | PIGN-FLT_P7H                                                                                                           | CASRATLGSGTEQYF  | Clear Cell Renal Carcinoma, Neoantigen                                             | FNDC3B                                                                   |
|       | 3  | CAMREPRSNDYKLSF  |                                |                                                                                                                        | CASRGGTGGGKTQYF  | Neoantigen, Melanoma                                                               | RYR3-VLN_E6K, AKAP13, MART-1                                             |
|       | 4  |                  |                                |                                                                                                                        | CASRATLGSGTEQYF  | Clear Cell Renal Carcinoma, Neoantigen                                             | FNDC3B                                                                   |
|       | 5  | CLVGPGTYKYIF     | Neoantigen                     | CHD8-KLN                                                                                                               | CATSGTSTLYNEQFF  | Breast Cancer, Neoantigen, Melanoma                                                | IVPA_FMY, MART-1                                                         |
|       | 6  | CAMRELNRRDDKIIF  |                                |                                                                                                                        | CASSFHDRADEKLFF  |                                                                                    |                                                                          |
|       | 7  | CAFMKPN DYKLSF   | Melanoma, Neoantigen, Lymphoma | MART-1, pp65, CNKSR1-SLA_A9V, BCL9L-FVY_T6I, PRSS16-LLL_L1Q, HCV-KLV(PE), APBB2-VQY_L7F, PHKA2-LLS, ITIH6-RLG, HCV-KLV | CASSRRDRQGTEAFF  |                                                                                    |                                                                          |
|       | 8  | CALTLTGTASKLTF   | Neoantigen                     | NSDHL-A9V<br>FNDC3B-VVL_L3M, ITIH6-RLG_G3V, GOLGA3-SLD_P4L, ITIH6-RLG                                                  | CASSPNYSNPQHF    | Neoantigen                                                                         | GNL3L_R4C                                                                |
|       | 9  | CAMRGRSYNTDKLIF  | Neoantigen                     |                                                                                                                        | CASSPQGRVTEAFF   |                                                                                    |                                                                          |
|       | 10 | CAVDDYKLSF       | Neoantigen                     | CD1-LLG                                                                                                                | CASRGDYQETQYF    |                                                                                    |                                                                          |
| TSCC5 | 1  | CAVSGDTGRRALTF   |                                |                                                                                                                        | CASSVTNQETQYF    | Melanoma, Neoantigen                                                               | Mutated CDKNA2, GANAB-S5F, NSDHL-A9V                                     |
|       | 2  | CAASWGKAAGNKLTF  |                                |                                                                                                                        | CASSLVGEGNTEAFF  | Neoantigen                                                                         | GANAB-S5F, GNL3L_R4C                                                     |
|       | 3  | CAAKGIGGSYIPTF   | Neoantigen                     | NSDHL-A9V, WDR46_T3I                                                                                                   | CASSPSDDKNIQYF   | Melanoma                                                                           | MART-1                                                                   |
|       | 4  | CAASSNQGGKLIF    | Neoantigen                     | HTR1F-9_V1M, HAFP_FMN                                                                                                  | CASSLGPNYEQYF    | Neoantigen                                                                         | ATP6AP1-KLG_G3W                                                          |

|       |    |                    |                      |                                    |                 |                      |
|-------|----|--------------------|----------------------|------------------------------------|-----------------|----------------------|
|       | 5  | CALTPPGHSSASKIIF   | Neoantigen           | TRIM58-VLA, ERBB2-ALI_H8Y          | CASSRLAGEGETQYF |                      |
|       | 6  | CAFCFYNNNDMRF      |                      |                                    | CASSLRGANVLTf   |                      |
|       | 7  | CAARSEYGNKLVF      | Melanoma, Neoantigen | MART-1,TRPV4-FMI_A6T, TBX3-GMG_T8M | CASTLQDGGNSPLHF | Breast Cancer        |
|       | 8  | CAFNNNDMRF         | Melanoma             | MART-1                             | CSARDSGTTVYEQYF |                      |
|       | 9  | CAAFDGDSWGKLQF     | Neoantigen           | ITIH6-RLG, ZNT8_LLS                | CATSRGGTDTQYF   |                      |
|       | 10 | CLVGDPIVQKAAGNKLTF | Neoantigen           | GNL3L_R4C                          | CASSPSATNEKLFF  | Neoantigen, Melanoma |
| TSCC6 | 1  | CAVIARKAGTALIF     |                      |                                    | CSAKAGPGETQYF   | Melanoma             |
|       | 2  | CAVRFRYNDMRF       | Neoantigen           | PELP1-RLH_L7F, PXDNL-SIL_S1F       | CASSLWTGNTAEFF  | Neoantigen           |
|       | 3  | CAVVNRDDKIIF       | Neoantigen           | WDR46                              | CAWSWMSSYNEQFF  |                      |
|       | 4  | CAMREGEIGDYKLSF    |                      |                                    | CASSPQGATEAFF   | Neoantigen, Melanoma |
|       | 5  | CAASGASGGYNKLIF    |                      |                                    | CASSYSAPGYEQYF  | Melanoma, Neoantigen |
|       | 6  | CAEGDNTDKLIF       | Neoantigen           | ATP6AP1-KLG_G3W, GNL3L_R4C, SEC24A | CASQTGNQPQHF    |                      |
|       | 7  |                    |                      |                                    | CSAKAGPGETQYF   | Melanoma             |
|       | 8  | CAVILRGSQGNLIF     | Neoantigen           | NOS1-FID                           | CAISLDSQGGNGYTF |                      |
|       | 9  | CASAPSGNTPLVF      | Melanoma             | MART-1                             | CASSLGTYNQYF    | Neoantigen           |
|       | 10 | CAGPITQGGSEKLVF    | Tumor                | NY-ESO-1                           | CASSRGGQAYEQYF  |                      |
